# Supplementary material for: Stiff and strong hydrogel tube with great mechanical properties and high stability in various solutions
Source: Royal Society of Chemistry journal article supplement (doi:10.1039/d2tb00124a), 2022-01-01
Supplement: d2tb00124a1.pdf [file d2tb00124a1.pdf]

**Supporting Information**

**Stiff and Strong Hydrogel Tube with Great  
Mechanical Properties and High Stability in  
Various Solutions**

*Qiong Lv<sup>a</sup> Xingyue Sun,<sup>a</sup> Lina Ye,<sup>\*b</sup> and Haiyi Liang<sup>\*ac</sup>*

<sup>a</sup>*CAS Key Laboratory of Mechanical Behavior and Design of Materials, Department of Modern Mechanics, University of Science and Technology of China, Hefei, Anhui 230026, China.*

<sup>b</sup>*School of Material Science and Engineering, Anhui University, Hefei, Anhui 230601, China.*

<sup>c</sup>*IAT-Chungu Joint Laboratory for Additive Manufacturing, Anhui Chungu 3D Printing Institute of Intelligent Equipment and Industrial Technology, Wuhu, Anhui 241200, China.*

E-mail: 12010@ahu.edu.cn; hyliang@ustc.edu.cn

Phone: +86 (0)551 63601622. Fax: +86 (0)551 63606459

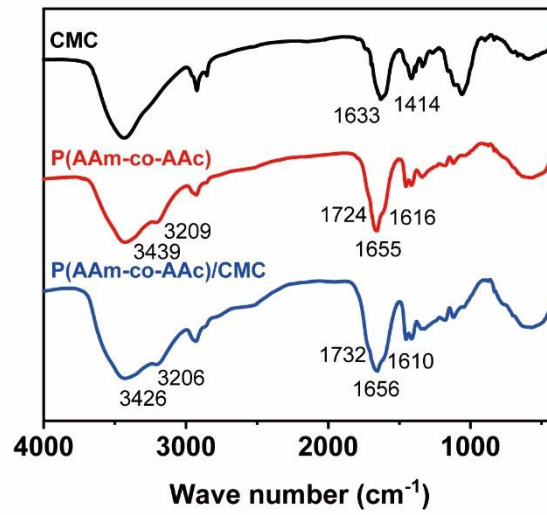

Fig.S1. FT-IR spectra of CMC SN hydrogel, P(AAm-co-AAc) SN hydrogel, and P(AAm-co-AAc)/CMC DN hydrogel.

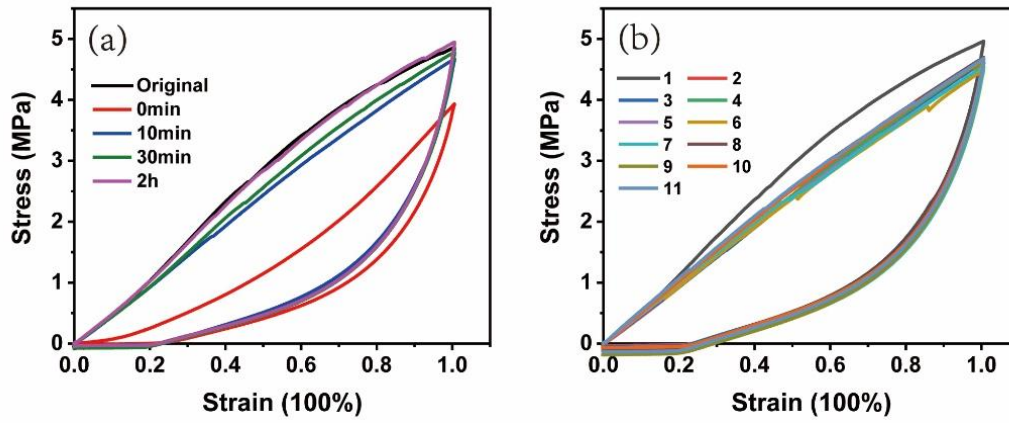

Fig.S2. (a) Recovery curves of DN-Fe hydrogels stored at room temperature for different durations. (b) Ten successive recovery curves of DN-Fe hydrogels stored at room temperature for 10 min resting time

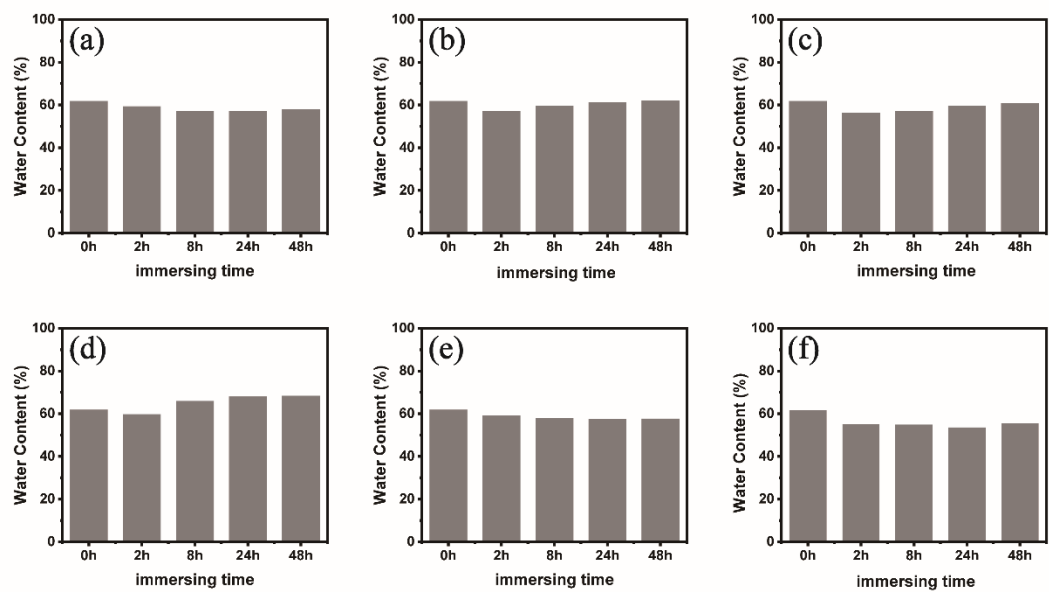

Fig. S3 The water content of DN-Fe hydrogels immersed in (a) H<sub>2</sub>O, (b) PBS, (c) pH=4.01, (d) pH=10, (e) physiological saline (NS) and, (f) 2M NaCl for different time.

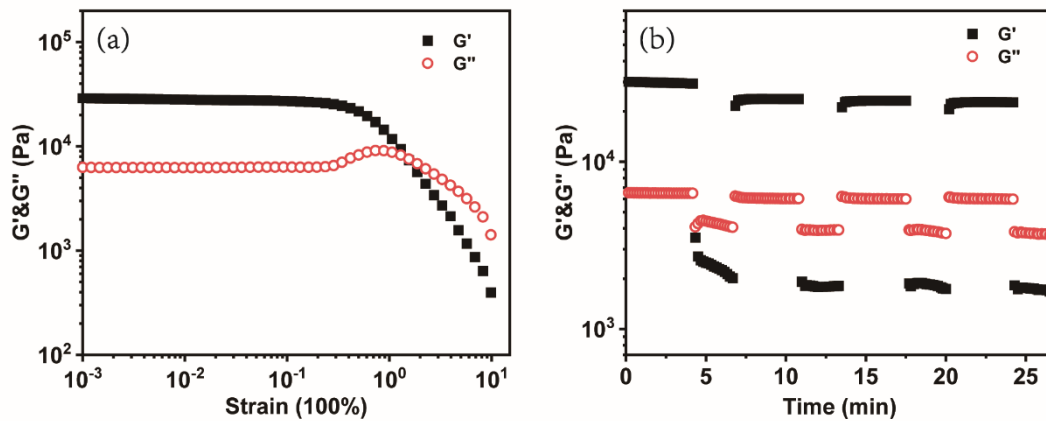

Fig.S4 (a) The rheological experiment of the DN hydrogel. Elastic moduli  $G'$  (black square) and viscous moduli  $G''$  (red circle) as a function of strain amplitude for the DN hydrogel. (b) Elastic moduli  $G'$  (solid black square) and viscous moduli  $G''$  (open red circle) of DN hydrogel in continuous step strain measurement.

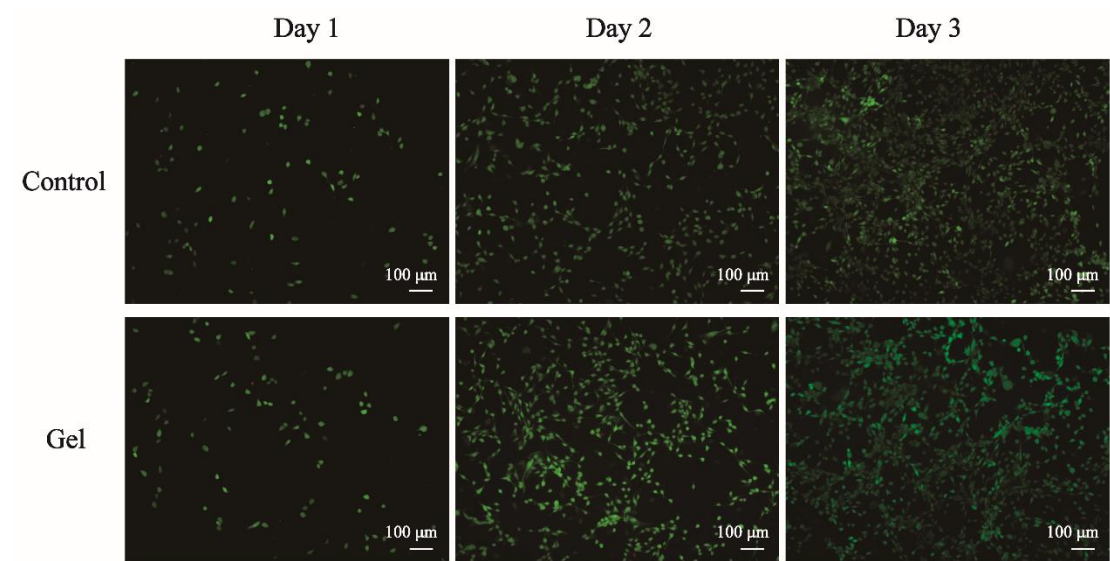

Fig.S5 Merge images of the live/dead cells after culturing with leaching solution of DN-Fe hydrogel tube. Cells cultured with DMEM are used as the control.

Table S1. Mechanical properties of P(AAm-co-AAc)/CMC/ Fe<sup>3+</sup> DN hydrogels with different concentration of AAc, CMC and Fe<sup>3+</sup>.

| <b>Hydrogel</b><br><b>AAc-CMC-Fe<sup>3+</sup></b><br><b>(mol%-wt%-M)</b> | <b>Fracture</b><br><b>Stress (MPa)</b> | <b>Elastic</b><br><b>Modulus</b><br><b>(MPa)</b> | <b>Fracture</b><br><b>Energy</b><br><b>(kJ/m<sup>2</sup>)</b> | <b>Water</b><br><b>Content</b><br><b>(%)</b> |
|--------------------------------------------------------------------------|----------------------------------------|--------------------------------------------------|---------------------------------------------------------------|----------------------------------------------|
| <b>0.15-0-0.1</b>                                                        | 2.87±0.34                              | 0.46±0.03                                        | 3.5±0.5                                                       | 74.8±0.5                                     |
| <b>0.175-0-0.1</b>                                                       | 3.59±0.39                              | 0.75±0.06                                        | 3.6±0.4                                                       | 71.2±0.4                                     |
| <b>0.2-0-0.1</b>                                                         | 5.26±0.84                              | 1.56±0.23                                        | 4.6±0.4                                                       | 67.3±0.6                                     |
| <b>0.225-0-0.1</b>                                                       | 7.35±0.79                              | 2.67±0.21                                        | 6.2±0.3                                                       | 62.2±1.2                                     |
| <b>0.25-0-0.1</b>                                                        | 8.91±1.42                              | 8.42±0.20                                        | 5.0±0.2                                                       | 59.8±2.0                                     |
| <b>0.225-1-0.1</b>                                                       | 7.04±0.53                              | 3.19±0.41                                        | 14.3±2.0                                                      | 61.7±1.1                                     |
| <b>0.225-2-0.1</b>                                                       | 7.81±0.36                              | 4.51±0.31                                        | 10.5±0.6                                                      | 59.8±0.4                                     |
| <b>0.225-3-0.1</b>                                                       | 7.08±0.34                              | 5.72±0.49                                        | 10.1±0.3                                                      | 58.1±2.9                                     |
| <b>0.225-4-0.1</b>                                                       | 6.79±0.31                              | 6.96±1.05                                        | 6.2±0.6                                                       | 59.3±2.4                                     |
| <b>0.225-1-0.05</b>                                                      | 5.73±0.60                              | 1.84±0.18                                        | 6.5±0.7                                                       | 67.1±0.2                                     |
| <b>0.225-1-0.15</b>                                                      | 7.75±0.49                              | 3.71±0.58                                        | 15.4±1.2                                                      | 61.7±0.1                                     |
| <b>0.225-1-0.2</b>                                                       | 8.09±0.61                              | 3.88±0.54                                        | 15.2±1.1                                                      | 58.3±0.9                                     |
| <b>0.225-1-0.25</b>                                                      | 7.14±0.29                              | 4.02±0.72                                        | 15.1±1.2                                                      | 56.1±0.5                                     |

Table S2. Mechanical properties of P(AAm-co-AAc)/CMC/ Fe<sup>3+</sup> DN hydrogels soaking in different solutions.

| <b>Solutions</b> | <b>Fracture<br/>(MPa)</b> | <b>Stress Elastic<br/>Modulus<br/>(MPa)</b> | <b>Fracture<br/>energy<br/>(kJ/m<sup>2</sup>)</b> | <b>Water<br/>Content<br/>(%)</b> |
|------------------|---------------------------|---------------------------------------------|---------------------------------------------------|----------------------------------|
| <b>Water</b>     | 9.92±0.49                 | 9.99±0.66                                   | 5.5±1.2                                           | 56.4±0.7                         |
| <b>PBS</b>       | 11.35±1.03                | 12.89±1.33                                  | 6.3±0.8                                           | 60.0±0.1                         |
| <b>pH=4.01</b>   | 9.52±0.48                 | 8.49±0.77                                   | 5.0±1.4                                           | 58.7±0.1                         |
| <b>pH=10</b>     | 8.74±0.47                 | 11.72±0.76                                  | 3.3±0.7                                           | 66.1±2.0                         |
| <b>NS</b>        | 11.36±0.34                | 13.18±1.18                                  | 4.3±0.9                                           | 56.8±2.9                         |
| <b>2M NaCl</b>   | 10.12±1.30                | 9.84±1.47                                   | 4.6±0.9                                           | 52.6±0.9                         |
